# Supplementary material for: Promising photovoltaic and solid-state-lighting materials: two-dimensional Ruddlesden–Popper type lead-free halide double perovskites Csn+1Inn/2Sbn/2I3n+1(n= 3) and Csn+1Inn/2Sbn/2Cl3n+1/Csm+1Cum/2Bim/2Cl3m+1(n= 3,m= 1)
Source: Royal Society of Chemistry journal article supplement (doi:10.1039/c8tc03926g), 2018-01-01
Supplement: c8tc03926g1.pdf [file c8tc03926g1.pdf]

**Supplementary Information for “Promising photovoltaic and  
solid-state-lighting materials: two-dimensional Ruddlesden-  
Popper type lead-free halide double perovskites**

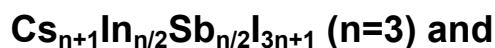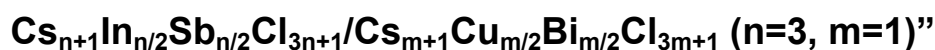

Meng Wu,<sup>a</sup> Jun-jie Shi,<sup>\*,a</sup> Min Zhang,<sup>b</sup> Yu-lang Cen,<sup>a</sup> Wen-hui Guo<sup>a</sup> and Yao-hui Zhu<sup>c</sup>

<sup>a</sup>*State Key Laboratory for Artificial Microstructures and Mesoscopic Physics, School of Physics, Peking University, Beijing 100871, China*

<sup>b</sup>*College of Physics and Electronic Information, Inner Mongolia Normal University, Hohhot 010022, China*

<sup>c</sup>*Physics Department, Beijing Technology and Business University, Beijing 100048, China*

\*E-mail: [jjshi@pku.edu.cn](mailto:jjshi@pku.edu.cn)

**Table S1** Values of the parameter *CUT* (in atomic units) and *l* together with the detailed half-ionized orbitals for  $M^+$ ,  $M^{3+}$  and  $X^-$  in our GGA-1/2 calculations are listed. Our *CUT* values for  $X^-$  are slightly smaller than those of ref. a-c (3.12, 3.34 and 3.76 for  $Cl^-$ ,  $Br^-$  and  $I^-$ ). This is because the anion *CUT* value usually has a small dependence on the chemical environment, as pointed out by Ferreira *et al.*<sup>d</sup>

| Atom      | <i>CUT</i> | <i>l</i> | Half-ionized orbital | Atom      | <i>CUT</i> | <i>l</i> | Half-ionized orbital |
|-----------|------------|----------|----------------------|-----------|------------|----------|----------------------|
| $In^+$    | 2.6        | 100      | d                    | $Sb^{3+}$ | 2.8        | 90       | d                    |
| $Cu^+$    | 2.8        | 100      | d                    | $Cl^-$    | 2.9        | 100      | p                    |
| $Ag^+$    | 3.1        | 100      | d                    | $Br^-$    | 3.1        | 100      | p                    |
| $Au^+$    | 3.0        | 100      | d                    | $I^-$     | 3.4        | 100      | p                    |
| $Bi^{3+}$ | 2.7        | 90       | d                    |           |            |          |                      |

<sup>a</sup> J. Jiang, C. K. Onwudinanti, R. A. Hatton, P. A. Bobbert and S. Tao, *J. Phys. Chem. C*, 2018, **122**, 17660.

<sup>b</sup> K. P. Marshall, S. Tao, M. Walker, D. S. Cook, J. Lloyd-Hughes, S. Varagnolo, A. Wijesekara, D. Walker, R. I. Walton and R. A. Hatton, *Mater. Chem. Front.*, 2018, **2**, 1515.

<sup>c</sup> S. X. Tao, X. Cao and P. A. Bobbert, *Sci. Rep.*, 2017, **7**, 14386.

<sup>d</sup> L. G. Ferreira, M. Marques and L. K. Teles, *Phys. Rev. B: Condens. Matter Mater. Phys.*, 2008, **78**, 125116.

**Table S2** The dependence of the GGA-1/2 bandgap on the half-ionized orbitals of metal atoms in  $\text{Cs}_2\text{In}_{1/2}\text{Sb}_{1/2}\text{I}_4$  and  $\text{Cs}_2\text{Cu}_{1/2}\text{Bi}_{1/2}\text{Cl}_4$ , in which the half ionization of the  $p$ -orbital in I and Cl atoms is included. Compared with the accurate GW bandgap, we can easily find that the correction of  $d$  orbital for both  $\text{M}^+$  and  $\text{M}^{3+}$  is necessary

| Material                                               | Half-ionized orbital      | Bandgap (eV)   |
|--------------------------------------------------------|---------------------------|----------------|
| $\text{Cs}_2\text{In}_{1/2}\text{Sb}_{1/2}\text{I}_4$  | In: $\times$ Sb: $\times$ | 0.58           |
|                                                        | In: p Sb: $\times$        | 0.62           |
|                                                        | In: d Sb: $\times$        | 1.23           |
|                                                        | In: d Sb: p               | 1.40           |
|                                                        | In: d Sb: d               | 1.55, 1.55(GW) |
| $\text{Cs}_2\text{Cu}_{1/2}\text{Bi}_{1/2}\text{Cl}_4$ | Cu: $\times$ Bi: $\times$ | 2.34           |
|                                                        | Cu: p Bi: $\times$        | 2.80           |
|                                                        | Cu: d Bi: $\times$        | 3.58           |
|                                                        | Cu: d Bi: p               | 3.64           |
|                                                        | Cu: d Bi: d               | 3.82, 3.82(GW) |

**Table S3** Fully optimized lattice parameter  $a$  (in unit of Å) in lead-free  $n=1$  halide  $\text{Cs}_2\text{M}^{+1/2}\text{M}^{3+1/2}\text{X}_4$  double perovskites. Some previous experimental results in bulk phase are also given

| $\text{Cs}_2\text{M}^{+1/2}\text{M}^{3+1/2}$ | X     | $a$                          |                                     | $\text{Cs}_2\text{M}^{+1/2}\text{M}^{3+1/2}$ | X  | $a$   |
|----------------------------------------------|-------|------------------------------|-------------------------------------|----------------------------------------------|----|-------|
| $\text{Cs}_2\text{In}_{1/2}\text{Bi}_{1/2}$  | Cl    | 11.22                        |                                     | $\text{Cs}_2\text{Cu}_{1/2}\text{Bi}_{1/2}$  | Cl | 11.00 |
|                                              | Br    | 11.73                        |                                     |                                              | Br | 11.50 |
|                                              | I     | 12.32                        |                                     |                                              | I  | 12.36 |
| $\text{Cs}_2\text{In}_{1/2}\text{Sb}_{1/2}$  | Cl    | 11.10                        |                                     | $\text{Cs}_2\text{Cu}_{1/2}\text{Sb}_{1/2}$  | Cl | 10.89 |
|                                              | Br    | 11.60                        |                                     |                                              | Br | 11.37 |
|                                              | I     | 12.28                        |                                     |                                              | I  | 12.34 |
| $\text{Cs}_2\text{Ag}_{1/2}\text{Bi}_{1/2}$  | Cl    | n=1 2D                       | 10.98                               | $\text{Cs}_2\text{Au}_{1/2}\text{Bi}_{1/2}$  | Cl | 11.51 |
|                                              |       | bulk                         | 10.78 <sup>(exp)</sup> <sup>a</sup> |                                              |    |       |
|                                              |       | $\text{Cs}_2\text{AgBiCl}_6$ | 10.85                               |                                              |    |       |
|                                              | Br    | n=1 2D                       | 11.53                               |                                              | Br | 11.95 |
|                                              |       | bulk                         | 11.27 <sup>(exp)</sup> <sup>b</sup> |                                              |    |       |
|                                              |       | $\text{Cs}_2\text{AgBiBr}_6$ | 11.30                               |                                              |    |       |
| I                                            | 12.36 |                              | I                                   | 12.64                                        |    |       |
| $\text{Cs}_2\text{Ag}_{1/2}\text{Sb}_{1/2}$  | Cl    | 10.87                        |                                     | $\text{Cs}_2\text{Au}_{1/2}\text{Sb}_{1/2}$  | Cl | 11.39 |
|                                              | Br    | 11.41                        |                                     |                                              | Br | 11.82 |
|                                              | I     | 12.24                        |                                     |                                              | I  | 12.42 |

<sup>a</sup> E. T. McClure, M. R. Ball, W. Windl and P. M. Woodward, *Chem. Mater.*, 2016, **28**, 1348.

<sup>b</sup>A. H. Slavney, T. Hu, A. M. Lindenberg and H. I. Karunadasa, *J. Am. Chem. Soc.*, 2016, **138**, 2138.

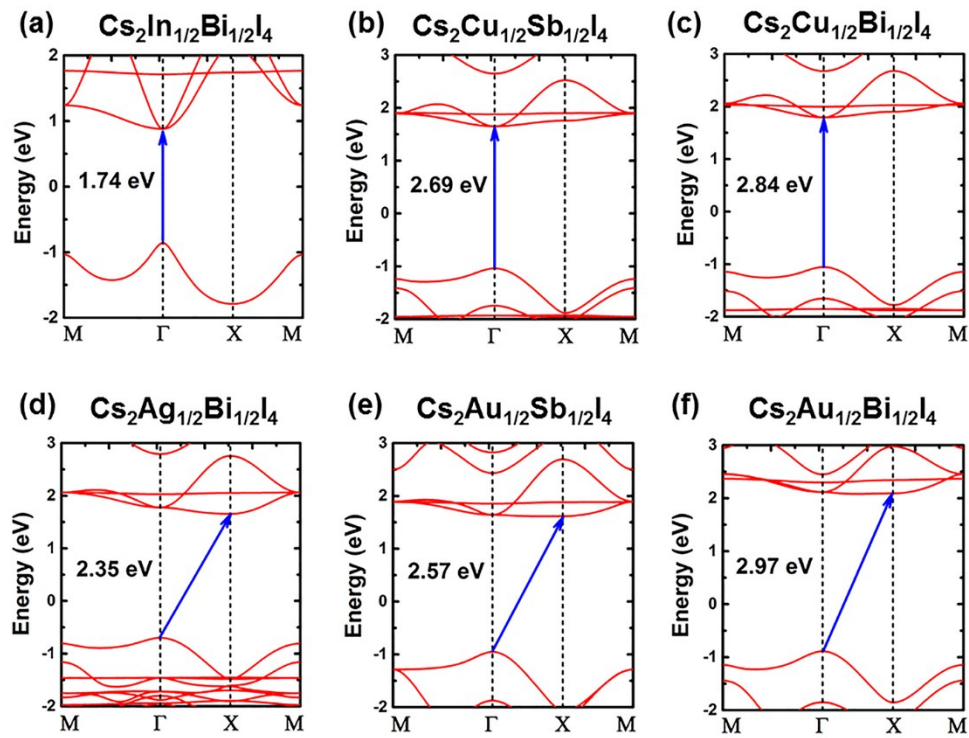

**Figure S1** Energy band structures of  $n=1$  lead-free halide double perovskites with direct bandgap (a)  $\text{Cs}_2\text{In}_{1/2}\text{Bi}_{1/2}\text{I}_4$ , (b)  $\text{Cs}_2\text{Cu}_{1/2}\text{Sb}_{1/2}\text{I}_4$  and (c)  $\text{Cs}_2\text{Cu}_{1/2}\text{Bi}_{1/2}\text{I}_4$ , and indirect bandgap (d)  $\text{Cs}_2\text{Ag}_{1/2}\text{Bi}_{1/2}\text{I}_4$ , (e)  $\text{Cs}_2\text{Au}_{1/2}\text{Sb}_{1/2}\text{I}_4$  and (f)  $\text{Cs}_2\text{Au}_{1/2}\text{Bi}_{1/2}\text{I}_4$ . Here, the band structures are derived from the GGA-PBE calculations, in which the underestimated bandgaps are modified according to GGA-1/2 calculations.

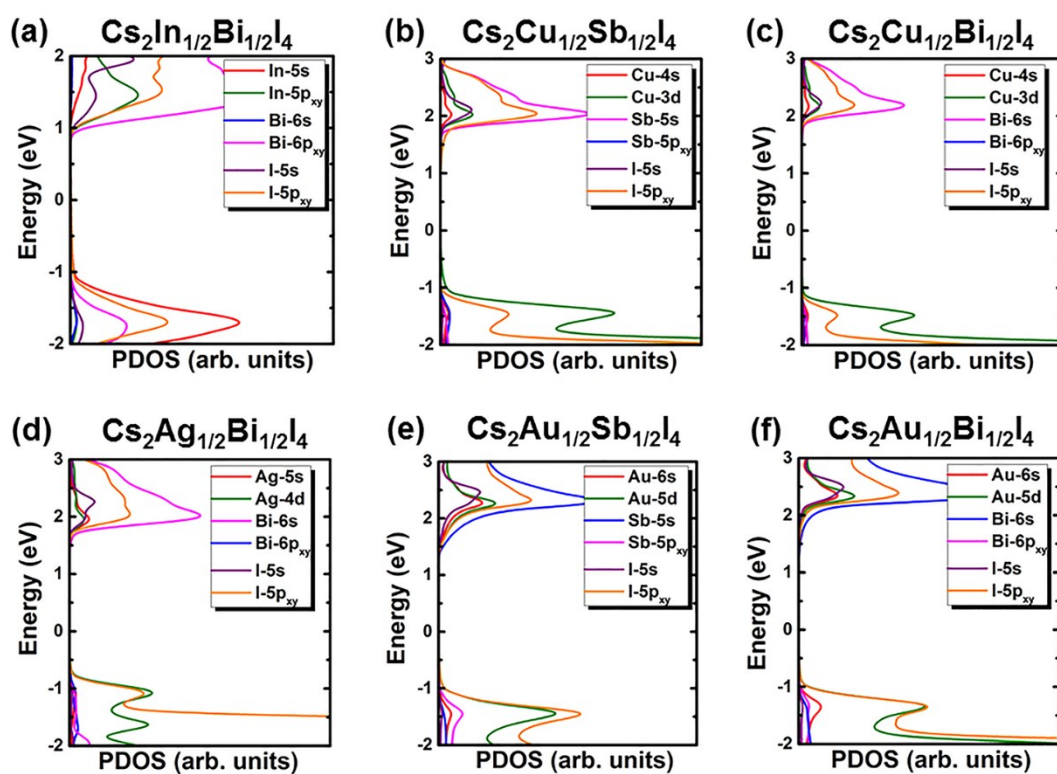

**Figure S2** PDOSs of  $n=1$  lead-free halide double perovskites with direct bandgap (a)  $\text{Cs}_2\text{In}_{1/2}\text{Bi}_{1/2}\text{I}_4$ , (b)  $\text{Cs}_2\text{Cu}_{1/2}\text{Sb}_{1/2}\text{I}_4$  and (c)  $\text{Cs}_2\text{Cu}_{1/2}\text{Bi}_{1/2}\text{I}_4$ , and indirect bandgap (d)  $\text{Cs}_2\text{Ag}_{1/2}\text{Bi}_{1/2}\text{I}_4$ , (e)  $\text{Cs}_2\text{Au}_{1/2}\text{Sb}_{1/2}\text{I}_4$  and (f)  $\text{Cs}_2\text{Au}_{1/2}\text{Bi}_{1/2}\text{I}_4$ .

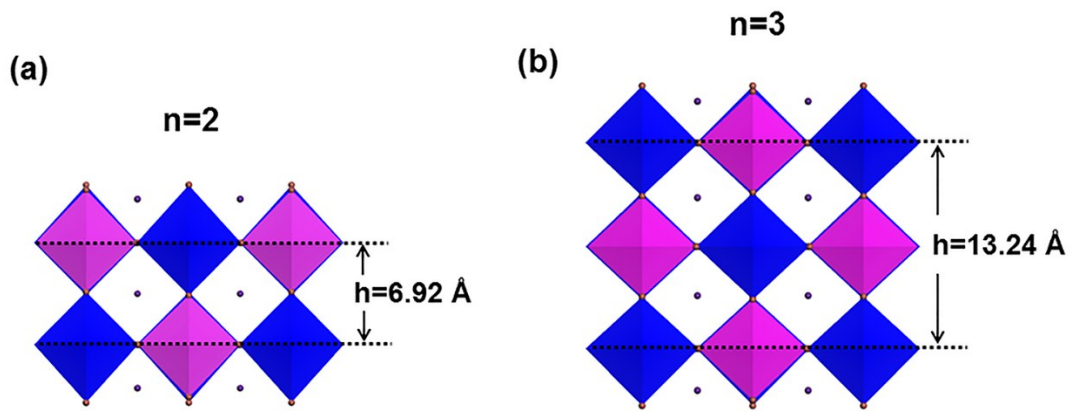

**Figure S3** The 2D double perovskite crystal structures of (a)  $n=2$   $\text{Cs}_3\text{InSbI}_7$  and (b)  $n=3$   $\text{Cs}_4\text{In}_{3/2}\text{Sb}_{3/2}\text{I}_{10}$  with the vertical distance of  $h=6.92$  and  $13.24 \text{ \AA}$ , respectively. Here, the stacking order of layered double perovskites, composed by the alternative  $\text{M}^+\text{X}$  (pink) and  $\text{M}^{3+}\text{X}$  (blue) octahedrons, is similar to their bulk counterparts.

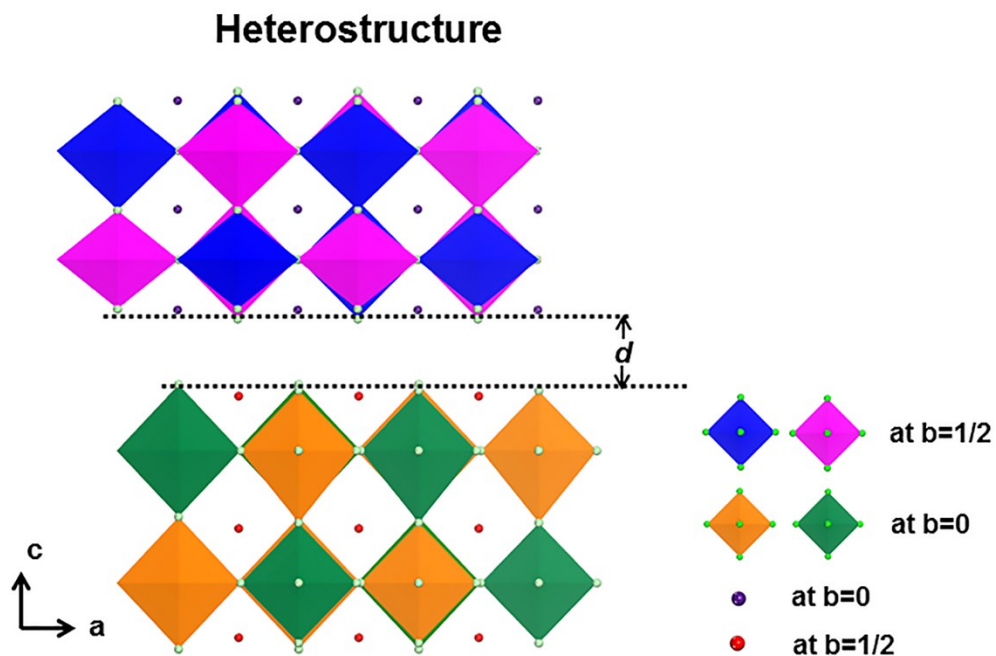

**Figure S4** Schematic illustration of the crystal structure of 2D lead-free halide double perovskite heterostructure. The different perovskite layers in the heterostructure are directly stacked together with a shift of  $b/2$  along the  $b$ -axis just as the bulk RP-type perovskite. A suitable strain exists to match the lattice constants of different layers. The  $d$  represents the interlayer distance between two different layers in the heterostructure.

**Table S4** The interlayer distance  $d$  (Å) and lattice mismatch of all considered 2D RP-type lead-free halide double perovskite heterostructures

| Material          | Layer thickness | $d$  | Lattice mismatch |
|-------------------|-----------------|------|------------------|
| CsInSbCl/CsCuBiCl | $n=1/m=1$       | 5.51 | 0.45%            |
|                   | $n=2/m=1$       | 5.54 | 0.67%            |
|                   | $n=1/m=2$       | 5.56 | 0.51%            |
|                   | $n=2/m=2$       | 5.65 | 0.53%            |
|                   | $n=3/m=1$       | 5.62 | 0.72%            |
| CsInBiCl/CsCuBiCl | $n=1/m=1$       | 5.58 | 0.98%            |
| CsInSbCl/CsAgBiCl | $n=1/m=1$       | 5.59 | 0.54%            |
| CsInBiCl/CsCuSbCl | $n=1/m=1$       | 5.57 | 1.47%            |
| CsAgSbBr/CsCuSbCl | $n=1/m=1$       | 5.64 | 2.27%            |
| CsAgSbBr/CsCuSbBr | $n=1/m=1$       | 5.78 | 0.17%            |
| CsAgSbI/CsCuSbI   | $n=1/m=1$       | 5.69 | 0.41%            |



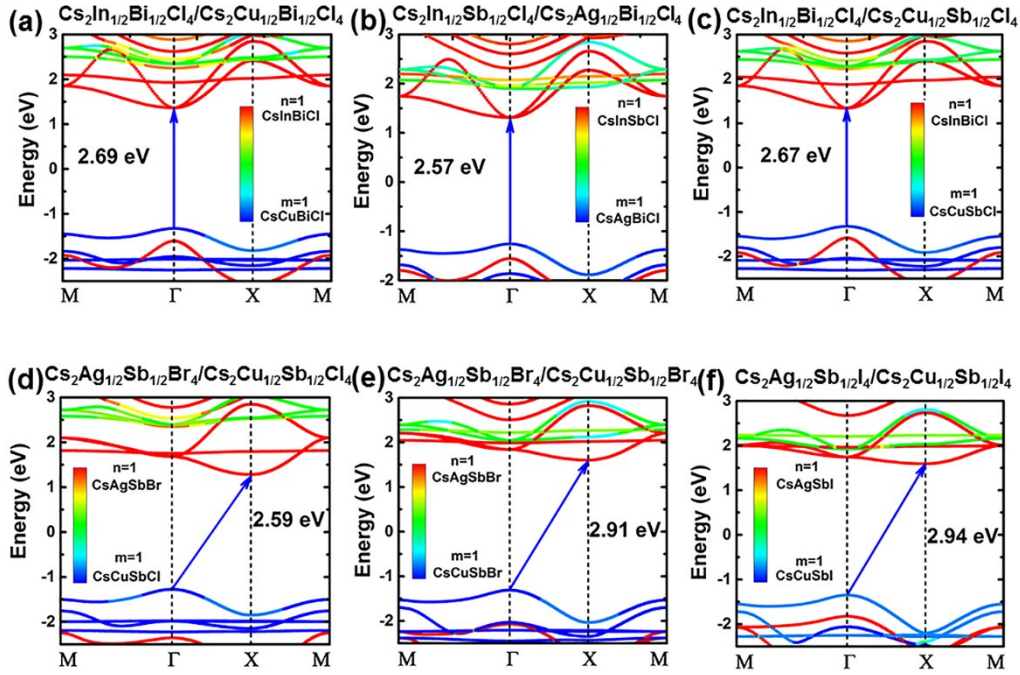

**Figure S5** The weighted energy band structures of  $n=1/m=1$  lead-free halide double perovskite heterostructures with type-II band alignment can be classified into two types, *i.e.*, direct bandgap (a)  $\text{Cs}_2\text{In}_{1/2}\text{Bi}_{1/2}\text{Cl}_4/\text{Cs}_2\text{Cu}_{1/2}\text{Bi}_{1/2}\text{Cl}_4$ , (b)  $\text{Cs}_2\text{In}_{1/2}\text{Sb}_{1/2}\text{Cl}_4/\text{Cs}_2\text{Ag}_{1/2}\text{Bi}_{1/2}\text{Cl}_4$  and (c)  $\text{Cs}_2\text{In}_{1/2}\text{Bi}_{1/2}\text{Cl}_4/\text{Cs}_2\text{Cu}_{1/2}\text{Sb}_{1/2}\text{Cl}_4$  and indirect bandgap (d)  $\text{Cs}_2\text{Ag}_{1/2}\text{Sb}_{1/2}\text{Br}_4/\text{Cs}_2\text{Cu}_{1/2}\text{Sb}_{1/2}\text{Cl}_4$ , (e)  $\text{Cs}_2\text{Ag}_{1/2}\text{Sb}_{1/2}\text{Br}_4/\text{Cs}_2\text{Cu}_{1/2}\text{Sb}_{1/2}\text{Br}_4$  and (f)  $\text{Cs}_2\text{Ag}_{1/2}\text{Sb}_{1/2}\text{I}_4/\text{Cs}_2\text{Cu}_{1/2}\text{Sb}_{1/2}\text{I}_4$ . Here, the band structures are derived from the GGA-PBE calculations, in which the underestimated bandgaps are modified according to GGA-1/2 calculations.

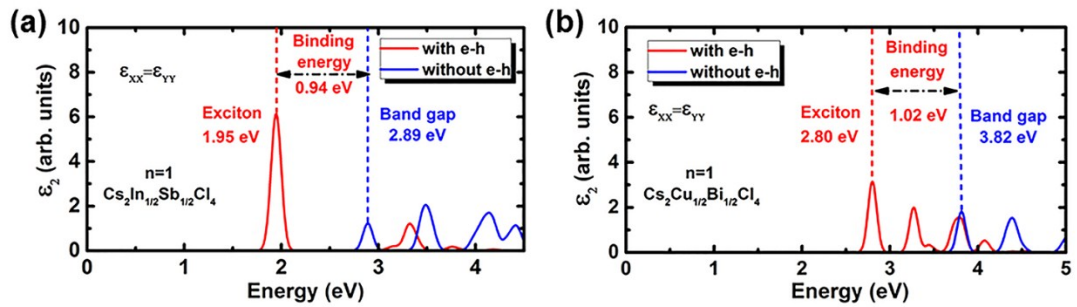

**Figure S6** The calculated imaginary parts  $\epsilon_2$  of dielectric function for freestanding  $n=1$  (a)  $\text{Cs}_2\text{In}_{1/2}\text{Sb}_{1/2}\text{Cl}_4$  and (b)  $\text{Cs}_2\text{Cu}_{1/2}\text{Bi}_{1/2}\text{Cl}_4$ .

**Table S5** The carrier effective mass  $m^*$  ( $m_0$ ) and the predicted carrier mobility  $\mu$  ( $\text{cm}^2\text{V}^{-1}\text{s}^{-1}$ ) in 2D lead-free  $n=1$  halide double perovskite  $\text{Cs}_2\text{M}^{+} \text{1/2M}^{3+} \text{1/2X}^{-4}$  and their  $n=1/m=1$  heterostructures

| Material                                                                                                                                     | X  | $m_h^*$ | $m_e^*$ | $\mu_h$ | $\mu_e$ | Material                                                                                                                                     | X  | $m_h^*$ | $m_e^*$ | $\mu_h$ | $\mu_e$ |
|----------------------------------------------------------------------------------------------------------------------------------------------|----|---------|---------|---------|---------|----------------------------------------------------------------------------------------------------------------------------------------------|----|---------|---------|---------|---------|
| MAPbI <sub>3</sub>                                                                                                                           | I  | 0.30    | 1.14    | 0.24    |         | MASnI <sub>3</sub>                                                                                                                           | I  | 0.22    | 1.10    | 0.18    |         |
| Cs <sub>2</sub> In <sub>1/2</sub> Bi <sub>1/2</sub>                                                                                          | Cl | 0.52    | 1.09    | 40      | 25      | Cs <sub>2</sub> Cu <sub>1/2</sub> Bi <sub>1/2</sub>                                                                                          | Cl | 0.85    | 0.90    | 26      | 10      |
|                                                                                                                                              | Br | 0.42    | 0.94    | 254     | 145     |                                                                                                                                              | Br | 0.81    | 0.88    | 76      | 58      |
|                                                                                                                                              | I  | 0.21    | 0.64    | 590     | 145     |                                                                                                                                              | I  | 0.75    | 0.84    | 110     | 96      |
| Cs <sub>2</sub> In <sub>1/2</sub> Sb <sub>1/2</sub>                                                                                          | Cl | 0.45    | 1.08    | 86      | 72      | Cs <sub>2</sub> Cu <sub>1/2</sub> Sb <sub>1/2</sub>                                                                                          | Cl | 0.80    | 0.84    | 150     | 121     |
|                                                                                                                                              | Br | 0.33    | 0.93    | 321     | 198     |                                                                                                                                              | Br | 0.74    | 0.82    | 230     | 165     |
|                                                                                                                                              | I  | 0.18    | 0.70    | 655     | 309     |                                                                                                                                              | I  | 0.62    | 0.80    | 311     | 196     |
| Cs <sub>2</sub> Ag <sub>1/2</sub> Bi <sub>1/2</sub>                                                                                          | Cl | 0.85    | 1.02    | 30      | 11      | Cs <sub>2</sub> Au <sub>1/2</sub> Bi <sub>1/2</sub>                                                                                          | Cl | 0.96    | 1.05    | 40      | 14      |
|                                                                                                                                              | Br | 0.74    | 0.98    | 101     | 50      |                                                                                                                                              | Br | 0.85    | 0.94    | 90      | 41      |
|                                                                                                                                              | I  | 0.66    | 0.93    | 210     | 121     |                                                                                                                                              | I  | 0.76    | 0.86    | 160     | 100     |
| Cs <sub>2</sub> Ag <sub>1/2</sub> Sb <sub>1/2</sub>                                                                                          | Cl | 0.83    | 1.06    | 50      | 30      | Cs <sub>2</sub> Au <sub>1/2</sub> Sb <sub>1/2</sub>                                                                                          | Cl | 0.90    | 1.02    | 92      | 55      |
|                                                                                                                                              | Br | 0.71    | 1.02    | 111     | 41      |                                                                                                                                              | Br | 0.81    | 0.89    | 160     | 117     |
|                                                                                                                                              | I  | 0.60    | 0.97    | 200     | 107     |                                                                                                                                              | I  | 0.75    | 0.81    | 234     | 160     |
| Cs <sub>2</sub> In <sub>1/2</sub> Sb <sub>1/2</sub> Cl <sub>4</sub> /<br>Cs <sub>2</sub> Cu <sub>1/2</sub> Bi <sub>1/2</sub> Cl <sub>4</sub> |    | 0.80    | 0.87    | 70      | 165     | Cs <sub>2</sub> Ag <sub>1/2</sub> Sb <sub>1/2</sub> Br <sub>4</sub> /<br>Cs <sub>2</sub> Cu <sub>1/2</sub> Sb <sub>1/2</sub> Cl <sub>4</sub> |    | 0.76    | 0.72    | 330     | 90      |
| Cs <sub>2</sub> In <sub>1/2</sub> Bi <sub>1/2</sub> Cl <sub>4</sub> /<br>Cs <sub>2</sub> Cu <sub>1/2</sub> Bi <sub>1/2</sub> Cl <sub>4</sub> |    | 0.81    | 0.90    | 50      | 65      | Cs <sub>2</sub> Ag <sub>1/2</sub> Sb <sub>1/2</sub> Br <sub>4</sub> /<br>Cs <sub>2</sub> Cu <sub>1/2</sub> Sb <sub>1/2</sub> Br <sub>4</sub> |    | 0.74    | 0.81    | 395     | 110     |
| Cs <sub>2</sub> In <sub>1/2</sub> Sb <sub>1/2</sub> Cl <sub>4</sub> /<br>Cs <sub>2</sub> Ag <sub>1/2</sub> Bi <sub>1/2</sub> Cl <sub>4</sub> |    | 0.85    | 0.42    | 50      | 122     | Cs <sub>2</sub> Ag <sub>1/2</sub> Sb <sub>1/2</sub> I <sub>4</sub> /<br>Cs <sub>2</sub> Cu <sub>1/2</sub> Sb <sub>1/2</sub> I <sub>4</sub>   |    | 0.56    | 0.89    | 598     | 224     |
| Cs <sub>2</sub> In <sub>1/2</sub> Bi <sub>1/2</sub> Cl <sub>4</sub> /<br>Cs <sub>2</sub> Cu <sub>1/2</sub> Sb <sub>1/2</sub> Cl <sub>4</sub> |    | 0.80    | 0.42    | 74      | 70      |                                                                                                                                              |    |         |         |         |         |
